# Supplementary material for: Soil moisture redistribution and its effect on inter-annual active layer temperature and thickness variations in a dry loess terrace in Adventdalen, Svalbard
Source: Copernicus journal article supplement (doi:10.5194/tc-2016-173), 2016-08-10
Supplement: Supplementary file 1 [file tc-2016-173-supplement.pdf]

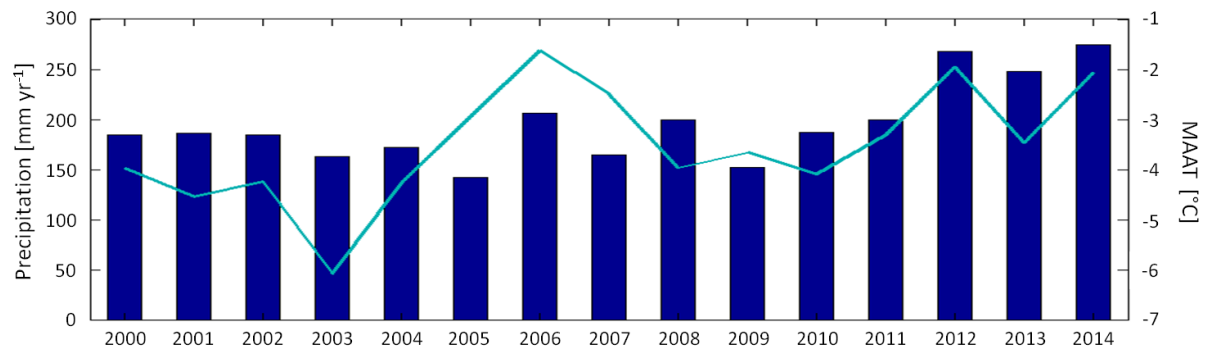

Figure S1: Mean annual precipitation [mm yr<sup>-1</sup>] (blue bars) and air temperature [°C] (cyan line) at Svalbard airport weather station between 2000 and 2014 (Data: Norwegian Meteorological Institute).
